# Supplementary material
Source: Elsevier journal article supplement (https://rcastoragev2.blob.core.windows.net/8e6a263be115c03c31f316592b233f1f/mmc1.pdf)
Supplement: mmc1 [file mmc1.pdf]

## Supplemental Information

### **The *Prevotella copri* Complex Comprises Four Distinct Clades Underrepresented in Westernized Populations**

Adrian Tett, Kun D. Huang, Francesco Asnicar, Hannah Fehlner-Peach, Edoardo Pasoli, Nicolai Karcher, Federica Armanini, Paolo Manghi, Kevin Bonham, Moreno Zolfo, Francesca De Filippis, Cara Magnabosco, Richard Bonneau, John Lusingu, John Amuasi, Karl Reinhard, Thomas Rattei, Fredrik Boulund, Lars Engstrand, Albert Zink, Maria Carmen Collado, Dan R. Littman, Daniel Eibach, Danilo Ercolini, Omar Rota-Stabelli, Curtis Huttenhower, Frank Maixner, and Nicola Segata

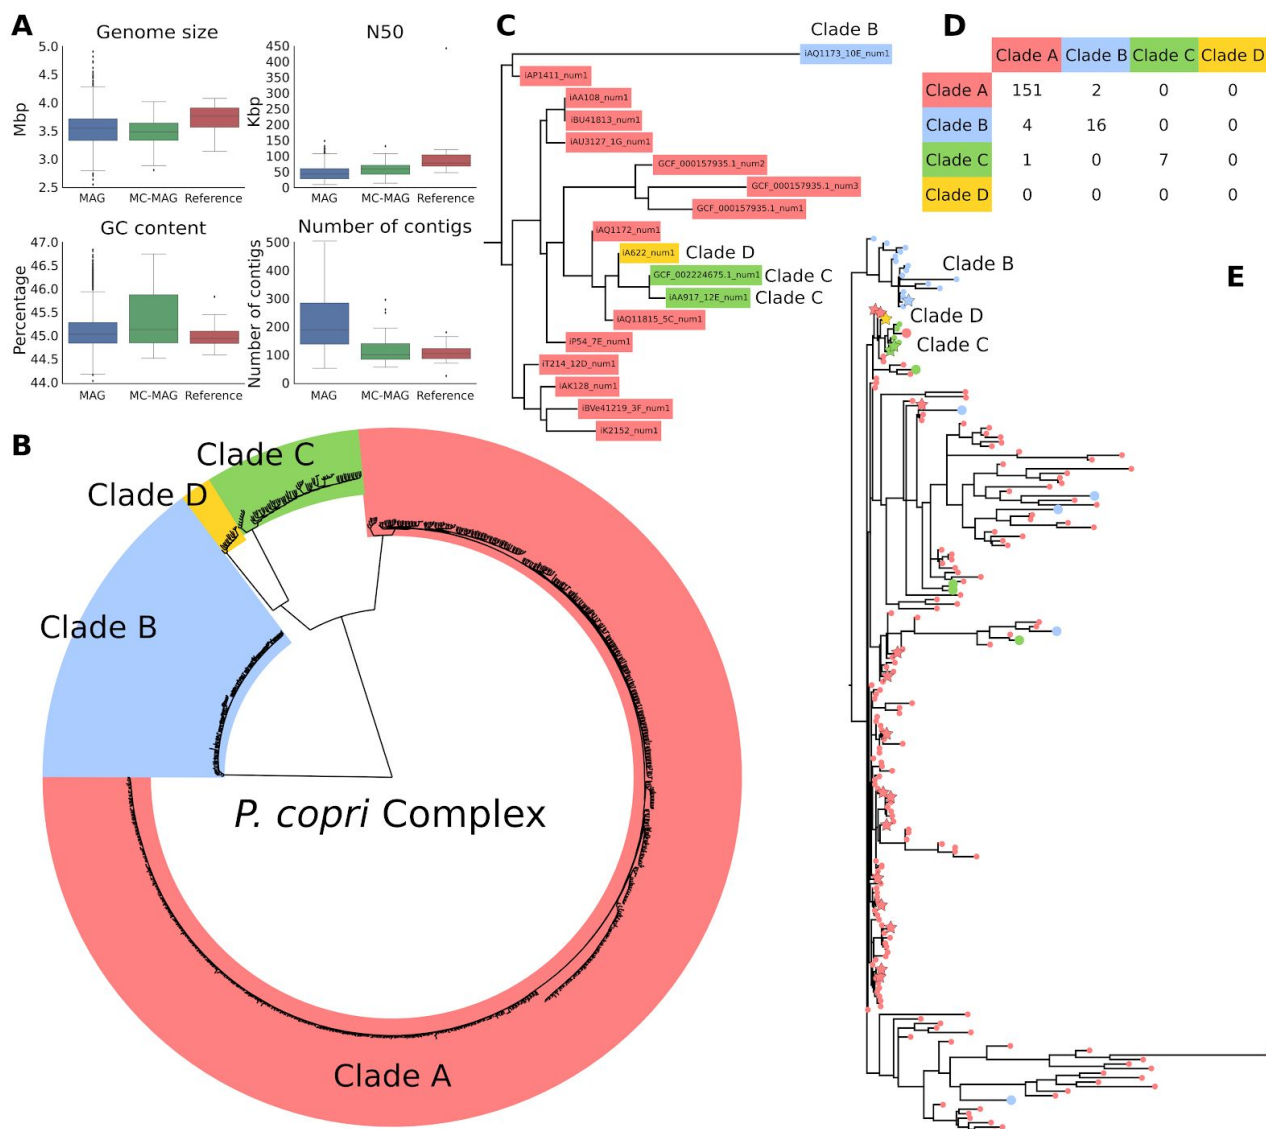

**Supplementary Figure S1. *P. copri* genome statistics and phylogenetic relatedness, related to Figure 1.** **A**) Comparison of genome statistics (Genome size, N50, GC% and number of contigs) for *P. copri* isolate sequences (references = 17), for manually curated metagenome assembled genomes (MC-MAG = 55) and automatically metagenome assembled genomes (MAGs = 951). **B**) Phylogenetic representation of all 1023 *P. copri* genomes based on a set of 210 *P. copri* core genes (see **Methods**). **C-E**. Relatedness of the 16S rRNA gene sequences of the four *P. copri* clades reveals weak resolving power in discriminating the four clades. **C**, Phylogeny of all 16S rRNA gene sequences (>1000bp) recovered from all 17 isolate genomes using Barnap (<https://github.com/tseemann/barnap>). **D**, Confusion matrix of all recovered 16S sequences (>1000bp) from all MAGs and their clan membership assigned based on the 16S rRNA gene sequence of the closest isolate genome (Blastn, >500bp alignment, identity > 85%) compared to their clan membership based on whole genome phylogenetic placement (panel B). **E**, 16S rRNA phylogenetic representation of all isolate genomes and MAGs. All alignments were produced using MAFFT (Kato and Standley, 2013) and the following parameters: mafft --globalpair --maxiterate 1000 and visualised using FastTree with default parameters (Price et al., 2010).

| A | # sample | Prevalence (Fisher) |         |         |         |         | Abundance (Mann-Whitney) |         |         |         |         | Dataset         | Condition                     |
|---|----------|---------------------|---------|---------|---------|---------|--------------------------|---------|---------|---------|---------|-----------------|-------------------------------|
|   |          | Any                 | Clade A | Clade B | Clade C | Clade D | Any                      | Clade A | Clade B | Clade C | Clade D |                 |                               |
|   | 66       | 27.3                | 21.2    | 7.6     | 12.1    | 3.0     | 6.7                      | 4.1     | 0.4     | 7.6     | 0.6     | ZellerG_2014    | Control                       |
|   | 42       | 35.7                | 33.3    | 11.9    | 9.5     | 4.8     | 11.6                     | 8.8     | 1.5     | 4.2     | 13.5    |                 | Adenoma                       |
|   | 91       | 26.4                | 20.9    | 11.0    | 7.7     | 4.4     | 6.6                      | 5.4     | 2.4     | 0.9     | 6.4     |                 | CRC                           |
|   | 133      | 29.3                | 24.8    | 11.3    | 8.3     | 4.5     | 8.6                      | 6.8     | 2.1     | 2.1     | 8.8     |                 | Adenoma/CRC                   |
|   | 61       | 8.2                 | 3.3     | 1.6     | 3.3     | 1.6     | 1.0                      | 0.5     | 1.5     | 0.8     | 1.1     | FengQ_2015      | Control                       |
|   | 46       | 39.1 *              | 39.1 *  | 4.3     | 17.4 *  | 0.0     | 7.0 *                    | 6.4 *   | 0.9     | 1.1 *   | 0.0     |                 | CRC                           |
|   | 47       | 17.0                | 12.8    | 4.3     | 6.4     | 0.0     | 2.0                      | 1.7     | 0.5     | 1.6     | 0.0     |                 | Adenoma                       |
|   | 93       | 28.0 *              | 25.8 *  | 4.3     | 11.8    | 0.0     | 5.5 *                    | 5.3 *   | 0.7     | 1.2     | 0.0     |                 | CRC/adenoma                   |
|   | 52       | 23.1                | 23.1    | 1.9     | 0.0     | 0.0     | 11.7                     | 11.7    | 0.2     | 0.0     | 0.0     | VogtmannE_2016  | Control                       |
|   | 52       | 19.2                | 19.2    | 0.0     | 0.0     | 0.0     | 12.6                     | 12.6    | 0.0     | 0.0     | 0.0     |                 | CRC                           |
|   | 53       | 28.3                | 24.5    | 1.9     | 7.5     | 0.0     | 10.2                     | 9.8     | 0.3     | 6.3     | 0.0     | YuJ_2015        | Control                       |
|   | 75       | 30.7                | 28.0    | 5.3     | 4.0     | 0.0     | 10.0                     | 10.2    | 2.2     | 2.7     | 0.0     |                 | CRC                           |
|   | 174      | 29.9                | 25.9    | 4.0     | 8.0     | 1.7     | 28.6                     | 26.4    | 10.2    | 15.1    | 5.2     | QinJ_2012       | Control                       |
|   | 170      | 28.2                | 25.3    | 6.5     | 10.0    | 1.8     | 17.2                     | 13.7    | 7.3     | 8.1     | 6.9     |                 | T2D                           |
|   | 43       | 14.0                | 11.6    | 0.0     | 7.0     | 0.0     | 2.1                      | 1.6     | 0.0     | 1.5     | 0.0     | KarlssonFH_2013 | Control                       |
|   | 102      | 16.7                | 14.7    | 2.0     | 2.9     | 2.0     | 4.4                      | 3.7     | 0.5     | 4.0     | 2.8     |                 | IGT/T2D                       |
|   | 49       | 10.2                | 6.1     | 2.0     | 4.1     | 0.0     | 2.6                      | 1.5     | 0.2     | 4.1     | 0.0     |                 | IGT                           |
|   | 53       | 22.6                | 22.6    | 1.9     | 1.9     | 3.8     | 5.1                      | 4.3     | 0.8     | 4.0     | 2.8     |                 | T2D                           |
|   | 41       | 39.0                | 39.0    | 7.3     | 4.9     | 0.0     | 31.2                     | 29.7    | 2.5     | 8.5     | 0.0     | LiJ_2017        | Control                       |
|   | 99       | 48.5                | 47.5    | 11.1    | 16.2    | 2.0     | 37.3                     | 31.6    | 4.2     | 13.8    | 18.6    |                 | Hypertension                  |
|   | 56       | 53.6                | 48.2    | 3.6     | 19.6 *  | 1.8     | 41.4                     | 39.0    | 11.4    | 14.9 *  | 2.1     |                 | Pre-hypertension              |
|   | 155      | 50.3                | 47.7    | 8.4     | 17.4 *  | 1.9     | 38.9                     | 34.3    | 5.3     | 14.2 *  | 13.1    |                 | Pre-hypertension/hypertension |
|   | 71       | 25.4                | 25.4    | 1.4     | 2.8     | 0.0     | 8.6                      | 8.1     | 0.4     | 4.6     | 0.0     | NielsenHB_2014  | Control                       |
|   | 148      | 33.8                | 29.7    | 11.5 *  | 3.4     | 6.1 *   | 11.5                     | 10.1    | 2.8 *   | 8.9     | 4.5 *   |                 | IBD                           |
|   | 53       | 26.4                | 24.5    | 1.9     | 11.3    | 3.8     | 15.1                     | 12.5    | 1.1     | 6.7     | 3.4     | HeQ_2017        | Control                       |
|   | 63       | 12.7                | 11.1    | 4.8     | 3.2     | 0.0     | 45.9                     | 31.6    | 17.6    | 46.6    | 0.0     |                 | CD                            |
|   | 114      | 52.6                | 48.2    | 1.8     | 13.2    | 1.8     | 9.6                      | 9.1     | 4.8     | 3.9     | 2.1     | QinN_2014       | Control                       |
|   | 123      | 58.5                | 57.7    | 2.4     | 16.3    | 0.8     | 11.7                     | 9.7     | 1.5     | 6.8     | 14.5    |                 | Cirrhosis                     |
|   | 36       | 11.1                | 8.3     | 5.6     | 2.8     | 0.0     | 25.4                     | 26.2    | 10.0    | 3.0     | 0.0     | RaymondF_2016   | Control                       |
|   | 36       | 19.4                | 13.9    | 11.1    | 5.6     | 0.0     | 16.0                     | 17.6    | 4.6     | 2.8     | 0.0     |                 | Cephalosporins                |

| B | #Samples | Clade A |       | Clade B |       | Clade C |       | Dataset         | Condition                     |
|---|----------|---------|-------|---------|-------|---------|-------|-----------------|-------------------------------|
|   |          | Sub-1   | Sub-2 | Sub-1   | Sub-2 | Sub-1   | Sub-2 |                 |                               |
|   | 93       | 5.38    | 1.08  | 0.00    | 1.08  | 2.15    | 0.00  | FengQ_2015      | CRC/ADENOMA                   |
|   | 61       | 0.00    | 0.00  | 0.00    | 1.64  | 0.00    | 0.00  |                 | Control                       |
|   | 133      | 4.51    | 6.02  | 0.00    | 0.75  | 0.00    | 0.00  | ZellerG_2014    | CRC/ADENOMA                   |
|   | 66       | 6.06    | 1.52  | 0.00    | 0.00  | 1.52    | 0.00  |                 | Control                       |
|   | 52       | 3.85    | 13.46 | 0.00    | 0.00  | 0.00    | 0.00  | VogtmannE_2016  | CRC                           |
|   | 52       | 0.00    | 21.15 | 0.00    | 0.00  | 0.00    | 0.00  |                 | Control                       |
|   | 75       | 10.67   | 6.67  | 0.00    | 1.33  | 0.00    | 0.00  | YuJ_2015        | CRC                           |
|   | 53       | 13.21   | 3.77  | 0.00    | 0.00  | 0.00    | 3.77  |                 | Control                       |
|   | 170      | 10.59   | 2.94  | 0.00    | 1.76  | 2.35    | 0.00  | QinJ_2012       | T2D                           |
|   | 174      | 14.94   | 2.87  | 0.00    | 1.72  | 1.72    | 0.57  |                 | Control                       |
|   | 102      | 2.94    | 4.90  | 0.00    | 0.00  | 0.00    | 0.00  | KarlssonFH_2013 | IGT/T2D                       |
|   | 43       | 2.33    | 0.00  | 0.00    | 0.00  | 0.00    | 2.33  |                 | Control                       |
|   | 155      | 14.19   | 12.26 | 0.00    | 1.29  | 0.65    | 2.58  | LiJ_2017        | Pre-hypertension/hypertension |
|   | 41       | 12.20   | 12.20 | 0.00    | 0.00  | 0.00    | 0.00  |                 | Control                       |
|   | 148      | 6.76    | 7.43  | 0.00    | 0.68  | 0.00    | 0.00  | NielsenHB_2014  | IBD                           |
|   | 71       | 8.45    | 8.45  | 0.00    | 0.00  | 0.00    | 0.00  |                 | Control                       |
|   | 63       | 6.35    | 0.00  | 0.00    | 1.59  | 1.59    | 0.00  | HeQ_2017        | CD                            |
|   | 53       | 9.43    | 0.00  | 0.00    | 0.00  | 0.00    | 3.77  |                 | Control                       |
|   | 123      | 16.26   | 2.44  | 0.00    | 0.00  | 0.00    | 1.63  | QinN_2014       | Cirrhosis                     |
|   | 114      | 11.40   | 3.51  | 0.00    | 1.75  | 0.88    | 0.88  |                 | Control                       |
|   | 36       | 0.00    | 5.56  | 0.00    | 8.33  | 0.00    | 0.00  | RaymondF_2016   | Cephalosporins                |
|   | 36       | 0.00    | 2.78  | 0.00    | 2.78  | 0.00    | 0.00  |                 | Control                       |

**Supplementary Figure S2. The *P. copri* complex with respect to metagenomically investigated human diseases. Related to Figure 2. A**, Prevalence and abundance of the *P. copri* complex in publicly available datasets for which there are case and control samples. \* indicates  $p < 0.05$  (Fisher exact test (prevalence) or Mann-Whitney U test (abundance)) **B**, There is no significant association of *P. copri* sub-clades and disease (Fisher exact test), see **Methods** for inference of sub-clades.

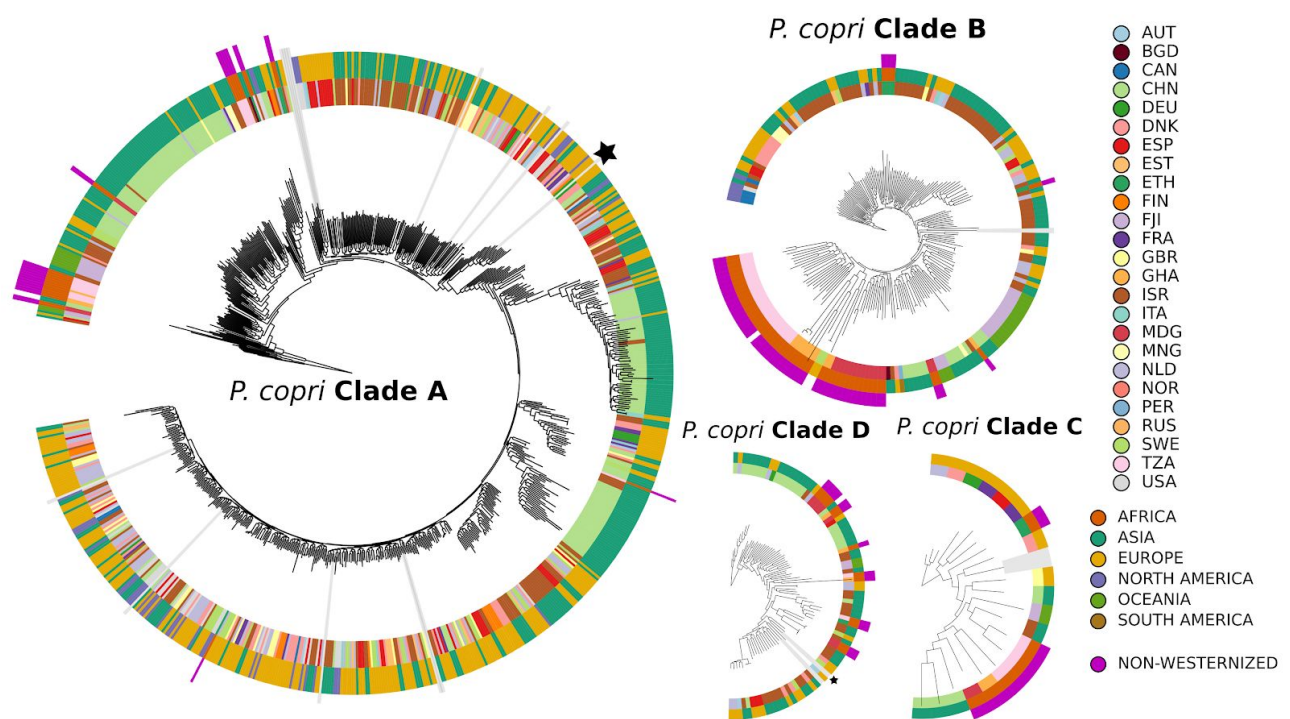

**Supplementary Figure S3. Phylogeny of all 1121 *P. copri* genomes reconstructed in this study. Related to Figure 3.** Outermost ring indicates if the genome was reconstructed from a non-Westernized sample (which includes the 98 genomes from our recently sequenced non-Westernized datasets), middle ring the continent and inner ring the country of origin. Publicly available *P. copri* references are indicated by black stars and our isolate genomes by radial gray bars.



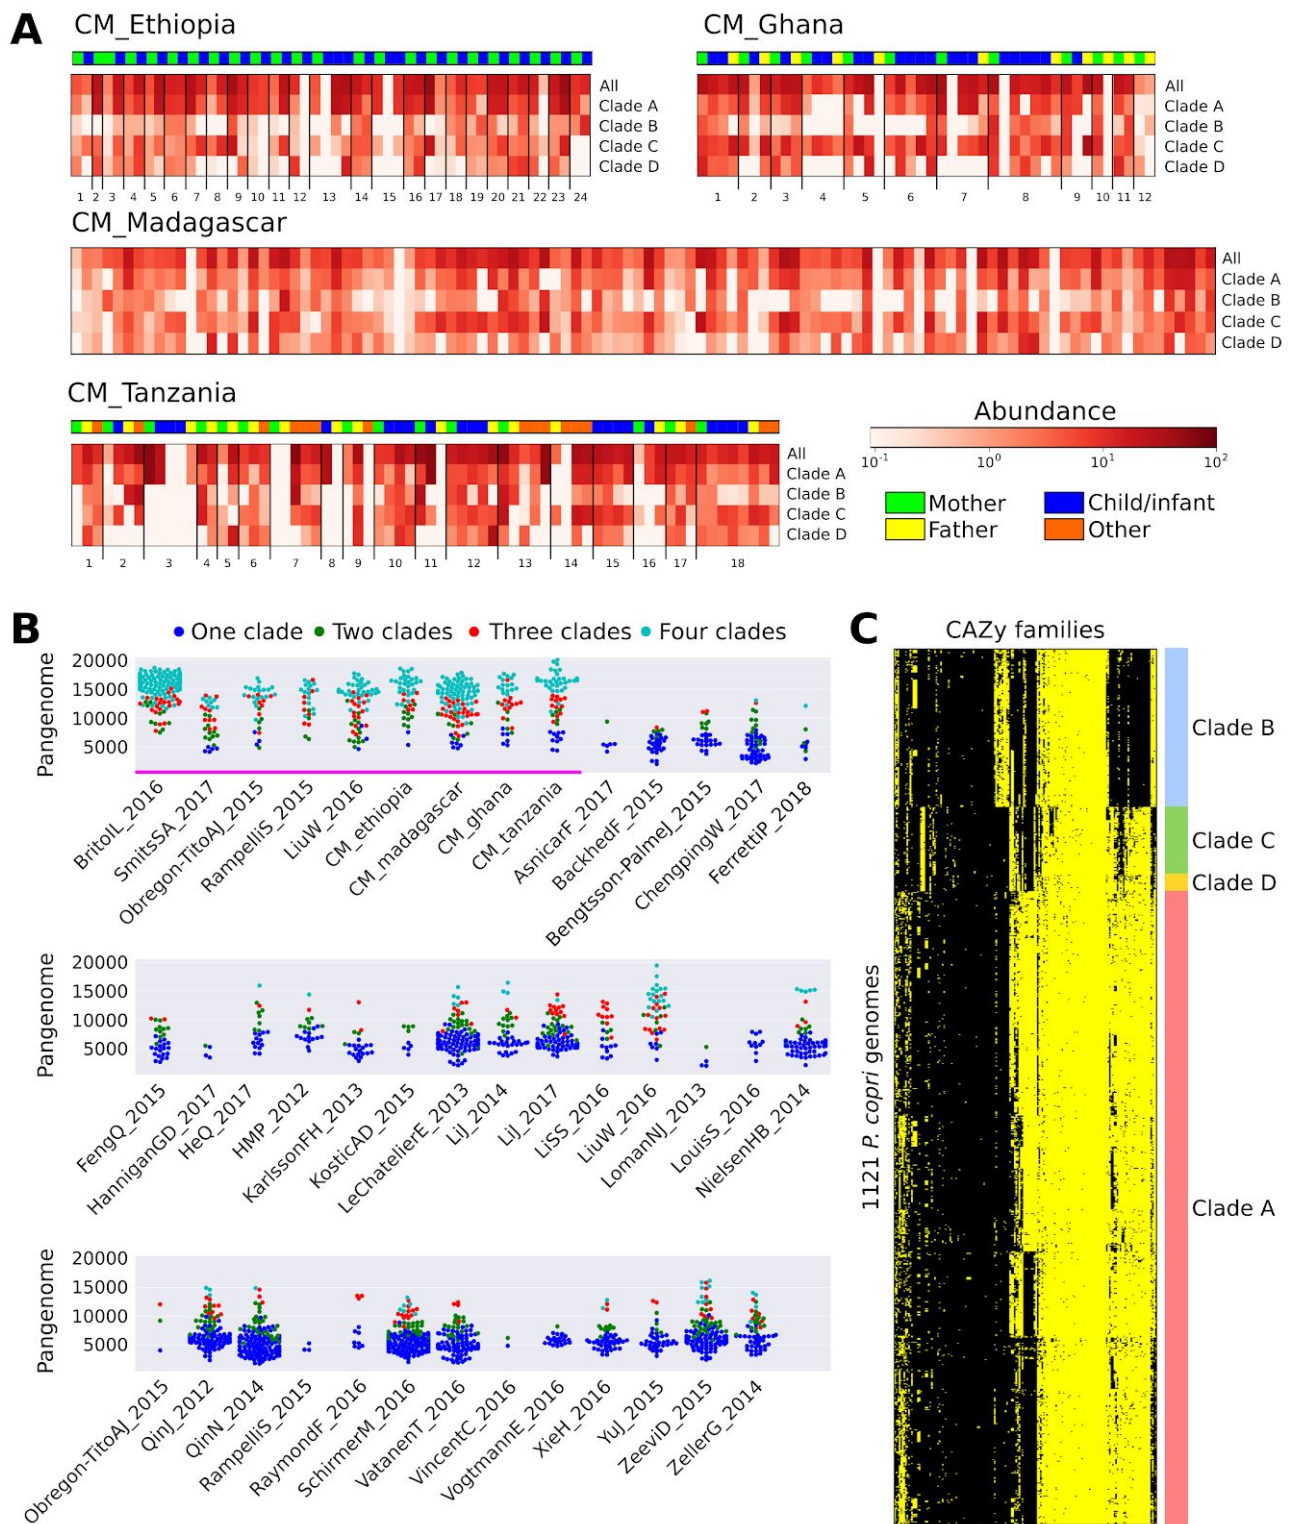

**Supplementary Figure 4. Abundance of *P. copri* in the recently sequenced non-Westernized datasets and functional diversity of the *P. copri* complex. Related to Figures 3 and 4. A,** Co-presence and abundance of the *P. copri* complex in our recently sequenced Non-westernized datasets. For datasets from Ethiopia, Ghana and Tanzania numbers refers to family membership. **B,** The within sample *P. copri* complex pangenome for datasets considered in this study. Non-Westernized datasets are underlined in magenta. **C,** Presence/absence heatmap of CAZy families in each of the 1121 *P. copri* genomes (yellow present, black absent)

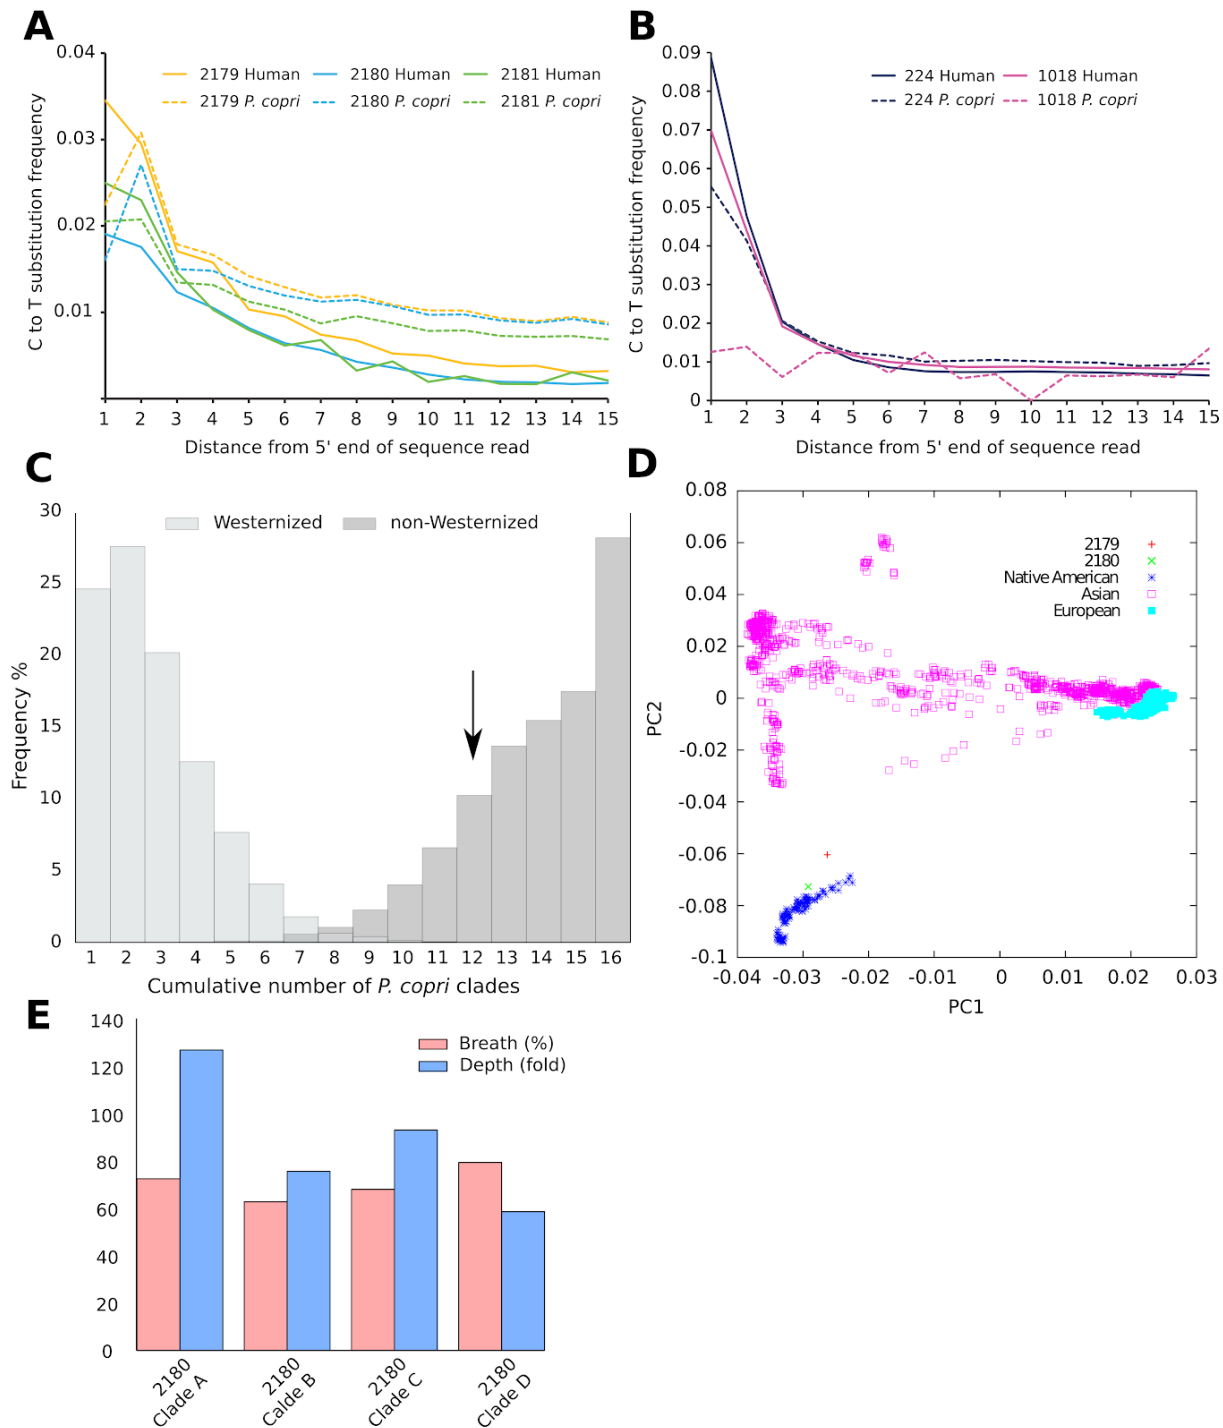

**Supplementary Figure S5. Analysis of the ancient ice-mummy and pre-Columbian amerind metagenomic samples. Related to Figure 5 and STAR methods.** Ancient DNA damage profiles. Cytosine to thymine substitution frequencies in the 5' end of the human and *P. copri* (dashed lines) sequence reads detected in the Mexican coprolite material (**A**) and in the Iceman samples (**B**). **C**, Co-presence of *P. copri* clades in ancient individuals is similar to contemporary non-Westernized individuals. Random subsampling of four individuals from either non-Westernized or Westernized populations and the cumulative number of *P. copri* clades observed (min 0, max 16). Subsampling repeated 10,000 times for each population. Black arrow indicates the number observed in the four ancient samples. **D**, PCA plot of two Mexican coprolite samples and selected modern European, Asian and Native American. Genome-wide ancient data was projected against a selected subset of the Affymetrix Human Origins populations. **E**, Depth and breadth of metagenomic reads from

sample 2180 mapped against four *P. copri* isolate genomes representing the four clades in the *P. copri* complex.
